# Supplementary material for: The Species-Level Composition of the Fecal Bifidobacterium and Lactobacillus Genera in Indonesian Children Differs from That of Their Mothers
Source: MDPI journal article supplement (doi:10.3390/microorganisms9091995), 2021-09-21

**Figure S1. Alpha-diversity illustrating richness and diversity in *Bifidobacterium* community (A) and *Bifidobacterium* composition at species level in maternal and infant feces (B).**

MFA: maternal feces (corresponding to infant younger than 1 month of age), MFB: maternal feces (corresponding to infant between 1 and 3 months of age), MFC: maternal feces (corresponding to infant between 3 and 6 months of age), MFD: maternal feces (corresponding to infant between 6 and 12 months of age), MFE: maternal feces (corresponding to infant older than 12 months of age), BFA: infant feces younger than 1 month of age, BFB: infant feces between 1 and 3 months of age, BFC: infant feces between 3 and 6 months of age, BFD: infant feces between 6 and 12 months of age, BFE: infant feces older than 12 months of age.

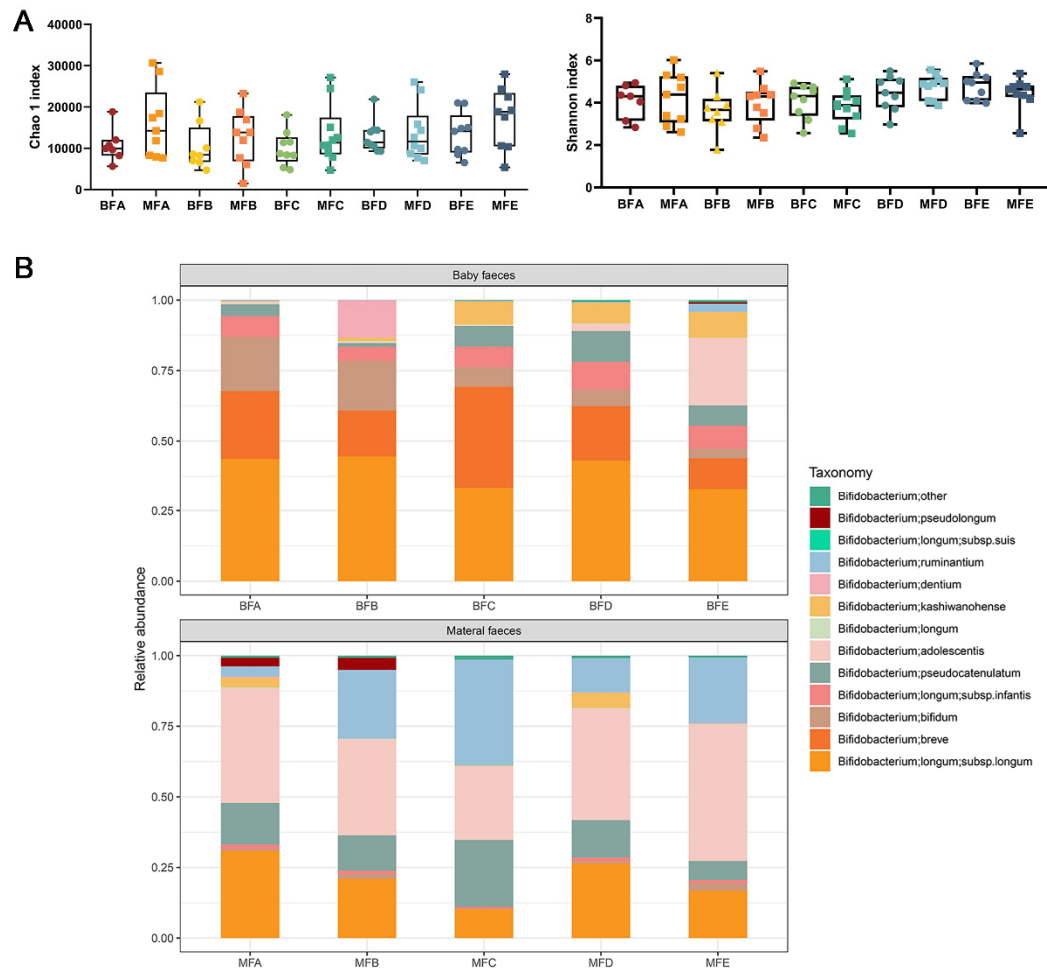

**Figure S2. Alpha-diversity illustrating richness and diversity in *Lactobacillus* community (A) and *Lactobacillus* composition at species level in maternal and infant feces (B).**

\*,  $p < 0.05$ ; MFA: maternal feces (corresponding to infant younger than 1 month of age), MFB: maternal feces (corresponding to infant between 1 and 3 months of age), MFC: maternal feces (corresponding to infant between 3 and 6 months of age), MFD: maternal feces (corresponding to infant between 6 and 12 months of age), MFE: maternal feces (corresponding to infant older than 12 months of age), BFA: infant feces younger than 1 month of age, BFB: infant feces between 1 and 3 months of age, BFC: infant feces between 3 and 6 months of age, BFD: infant feces between 6 and 12 months of age, BFE: infant feces older than 12 months of age.

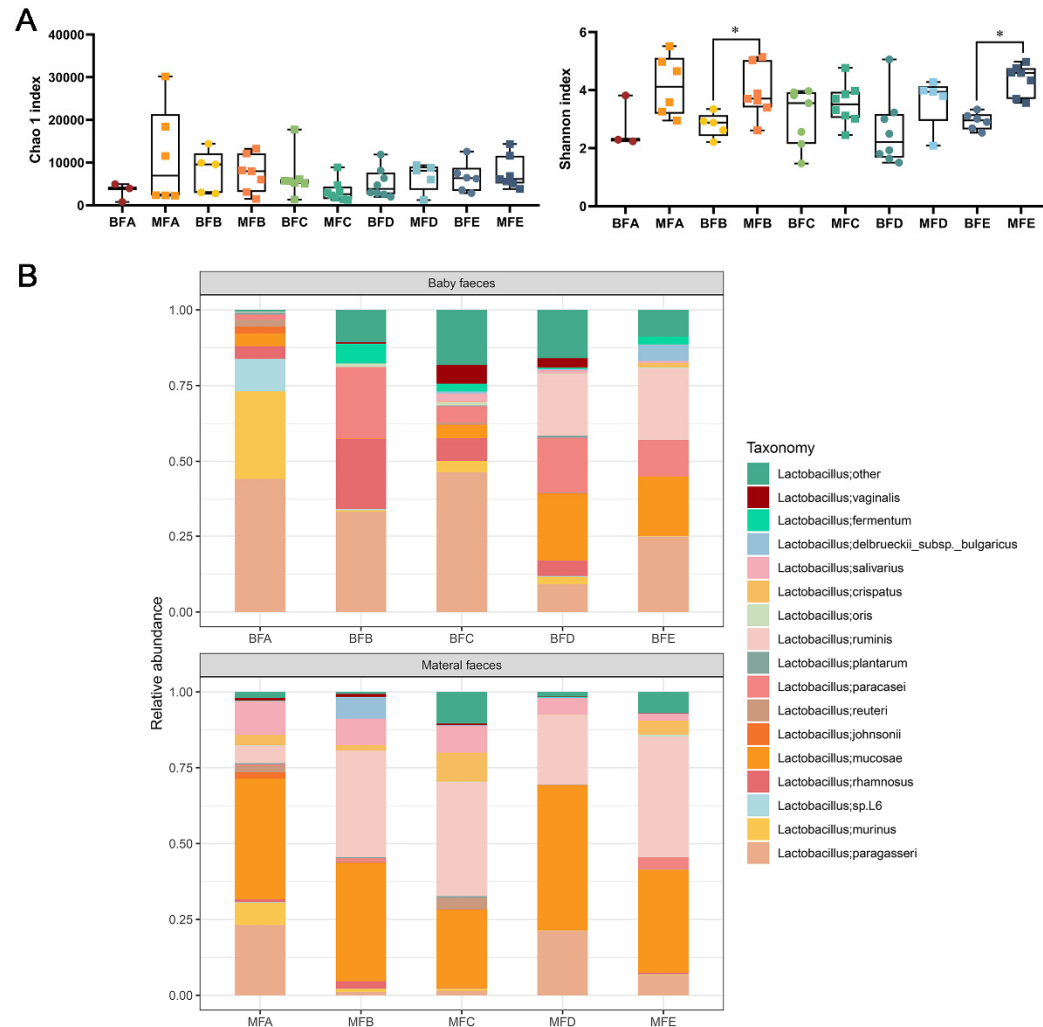

Supplement: s1 [file s1]
